# Supplementary material for: Periodic bond breaking and making in the electronic ground state on a sub-picosecond timescale: OH bending spectroscopy of malonaldehyde in the frequency domain at low temperature
Source: Royal Society of Chemistry journal article supplement (doi:10.1039/c002345k), 2010-01-01
Supplement: c002345k.pdf [file c002345k.pdf]

## Periodic Bond Breaking and Making in the Electronic Ground State on a Sub-Picosecond Timescale: OH Bending Spectroscopy of Malonaldehyde in the Frequency Domain at Low Temperature

by Nils O. B. Lüttchwager, Tobias N. Wassermann, Stéphane Coussan, Martin A. Suhm

Table S1: Band positions  $\tilde{\nu}/\text{cm}^{-1}$ , IR intensities  $I/\text{km mol}^{-1}$ , and Raman activities  $A/\text{\AA}^4 \text{u}^{-1}$  from B3LYP and MP2 calculations with the 6-311+G(d) basis set using the Gaussian03 program package.<sup>1</sup>  $\sigma'$  was calculated from  $A$  and  $\tilde{\nu}$  using equation 1. By clicking on the normal mode descriptions in the first column, a dynamic gif file of the corresponding normal mode is opened.

|                                                       | MP2/6-311+G(d) |     |      |           | B3LYP/6-311+G(d) |     |     |           |
|-------------------------------------------------------|----------------|-----|------|-----------|------------------|-----|-----|-----------|
|                                                       | $\tilde{\nu}$  | $I$ | $A$  | $\sigma'$ | $\tilde{\nu}$    | $I$ | $A$ | $\sigma'$ |
| <a href="#"><math>\delta\text{C}_a\text{H}</math></a> | 1299           | 180 | 3.7  | 17        | 1291             | 179 | 2.2 | 10        |
| <a href="#"><math>\delta\text{OH}</math></a>          | 1409           | 44  | 29.4 | 121       | 1395             | 90  | 17  | 71        |
| <a href="#"><math>\delta\text{C}_c\text{H}</math></a> | 1428           | 40  | 25.3 | 102       | 1409             | 29  | 7.9 | 32        |

For the comparison of theoretical predictions with experimental spectra, a conversion of the Raman scattering activities  $A$ , that are calculated by Gaussian03,<sup>1</sup> to the scattering cross sections  $\sigma'$  is useful. Equation 1 applies for the case of a photon counting measurement with a CCD detector and simultaneous detection of polarized and unpolarized light ( $\perp^s + \parallel^s$ ) at 90° detection geometry like it was used in this work. The polarization vector of the incident laser light was oriented perpendicularly to the plane of detection ( $\perp^i$ ). In equation 1,  $\tilde{\nu}_k$  and  $g_k$  are the vibrational wavenumber and the degeneracy of the corresponding vibration.  $\tilde{\nu}_0$  is the wavenumber of the incident laser light (in this work,  $\lambda_0 = 532 \text{ nm}$ , i.e.  $\tilde{\nu}_0 \approx 18797 \text{ cm}^{-1}$ ),  $h$  and  $k$  are Planck's and Boltzmann's constants,  $c$  is the speed of light and  $T$  the temperature. For the comparison with the supersonic jet expansion spectra,  $hc\tilde{\nu}_k \gg kT$  was assumed (corresponding to low temperatures in the expansion).

$$\sigma' \left( 90^\circ; \perp^s + \parallel^s, \perp^i \right) = \frac{2\pi^2 h}{45c\tilde{\nu}_k} \cdot \frac{(\tilde{\nu}_0 - \tilde{\nu}_k)^3 \tilde{\nu}_0}{1 - \exp\left(-\frac{hc\tilde{\nu}_k}{kT}\right)} \cdot g_k A. \quad (1)$$

## References

- [1] M. J. Frisch, G. W. Trucks, H. B. Schlegel, G. E. Scuseria, M. A. Robb, J. R. Cheeseman, J. A. Montgomery, Jr., T. Vreven, K. N. Kudin, J. C. Burant, J. M. Millam, S. S. Iyengar, J. Tomasi, V. Barone, B. Mennucci, M. Cossi, G. Scalmani, N. Rega, G. A. Petersson, H. Nakatsuji, M. Hada, M. Ehara, K. Toyota, R. Fukuda, J. Hasegawa, M. Ishida, T. Nakajima, Y. Honda, O. Kitao, H. Nakai, M. Klene, X. Li, J. E. Knox, H. P. Hratchian, J. B. Cross, C. Adamo, J. Jaramillo, R. Gomperts, R. E. Stratmann, O. Yazyev, A. J. Austin, R. Cammi, C. Pomelli, J. W. Ochterski, P. Y. Ayala, K. Morokuma, G. A. Voth, P. Salvador, J. J. Dannenberg, V. G. Zakrzewski, S. Dapprich, A. D. Daniels, M. C. Strain, O. Farkas, D. K. Malick, A. D. Rabuck, K. Raghavachari, J. B. Foresman, J. V. Ortiz, Q. Cui, A. G. Baboul, S. Clifford, J. Cioslowski, B. B. Stefanov, G. Liu, A. Liashenko, P. Piskorz, I. Komaromi, R. L. Martin, D. J. Fox, T. Keith, M. A. Al-Laham, C. Y. Peng, A. Nanayakkara, M. Challacombe, P. M. W. Gill, B. Johnson, W. Chen, M. W. Wong, C. Gonzalez, and J. A. Pople. *Gaussian 03, Revision B.04*. Gaussian Inc., Pittsburgh PA, 2003.
